# Supplementary material
Source: PubMed Central journal article supplement (PMC8852827)

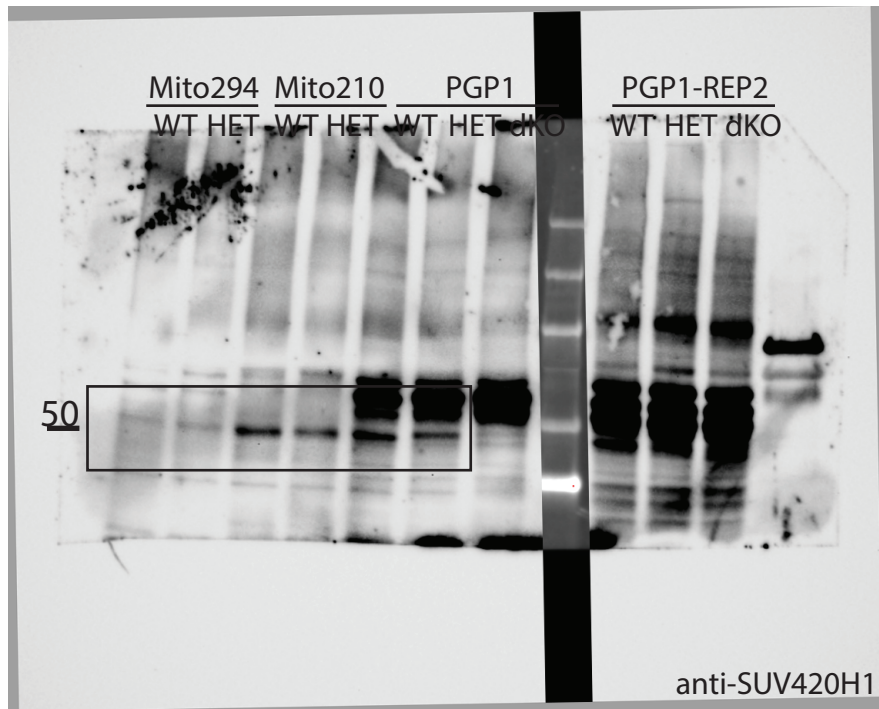

Used in Extended Figure 3d  
 lower part of the membrane was cut

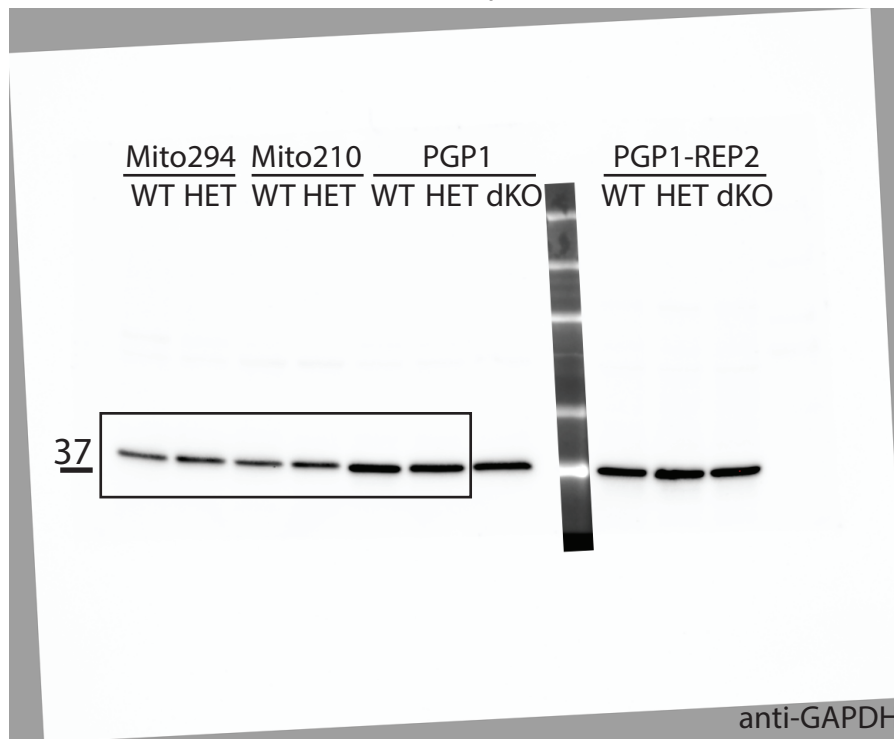

Used in Extended Figure 3d  
 lower part of the membrane was cut

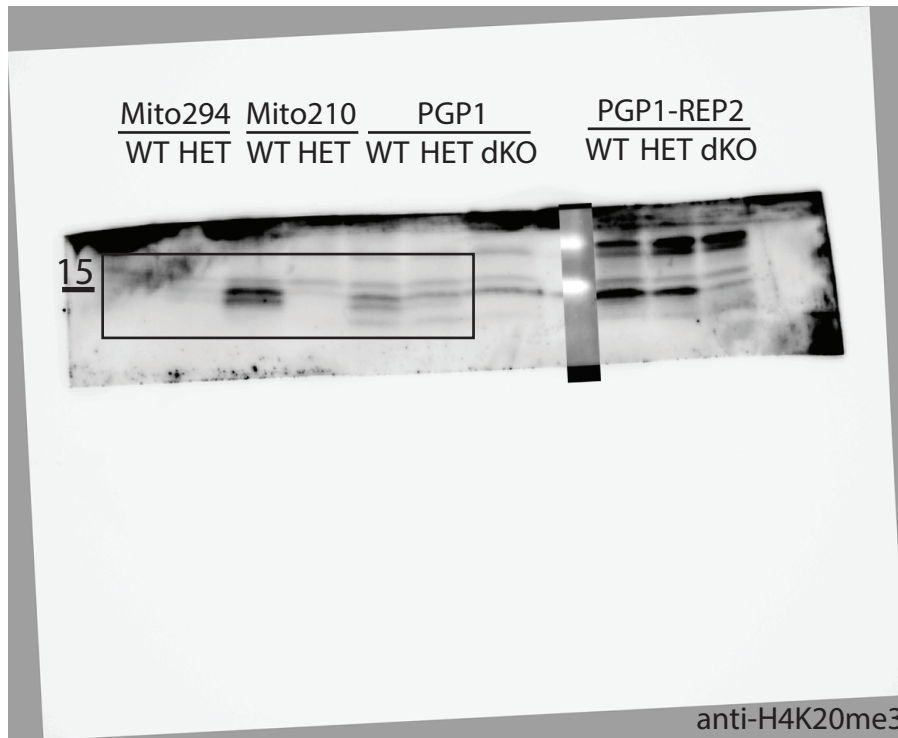

Used in Extended Figure 3d  
upper part of the membrane was cut

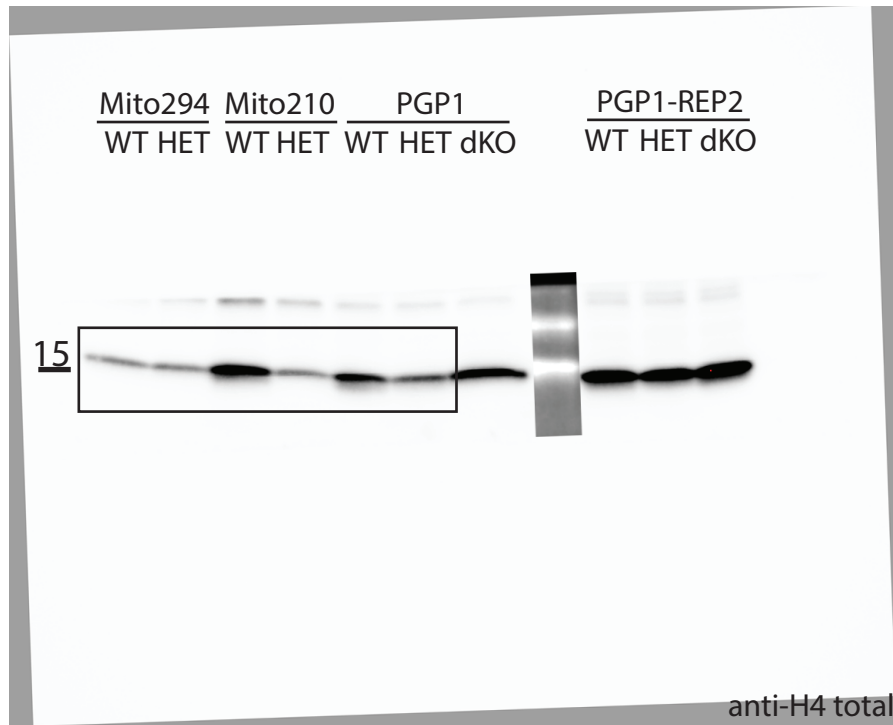

Used in Extended Figure 3d  
upper part of the membrane was cut

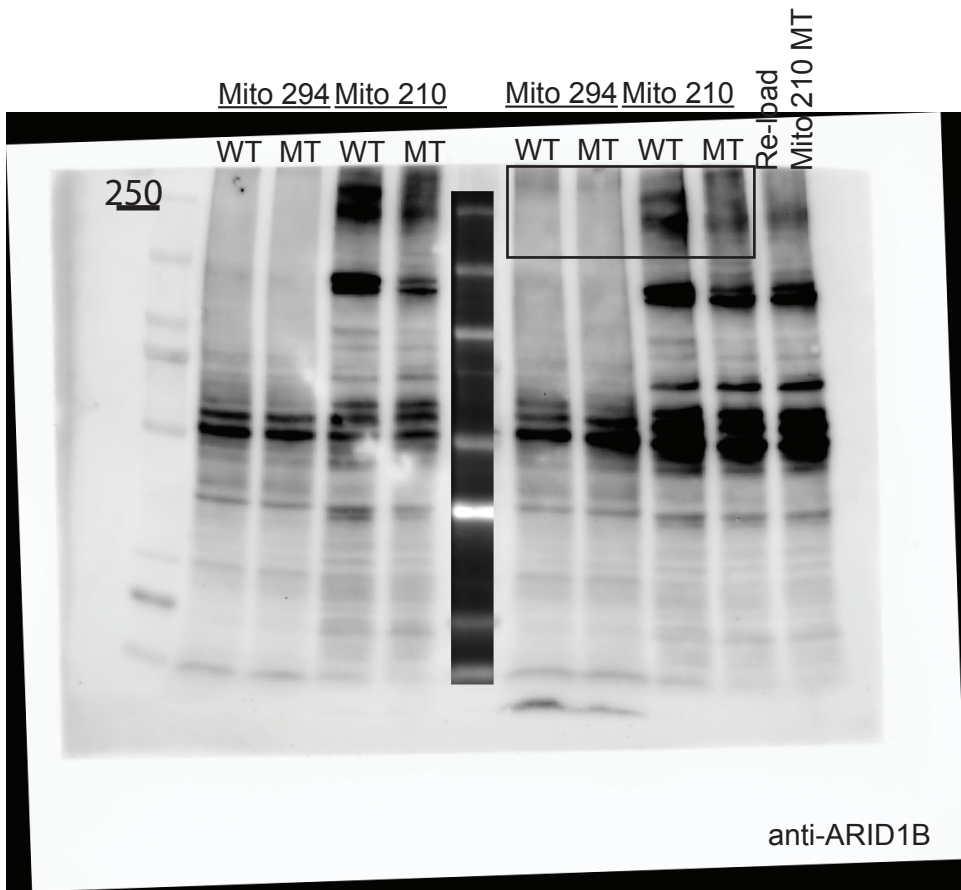

Used in Extended Figure 3e

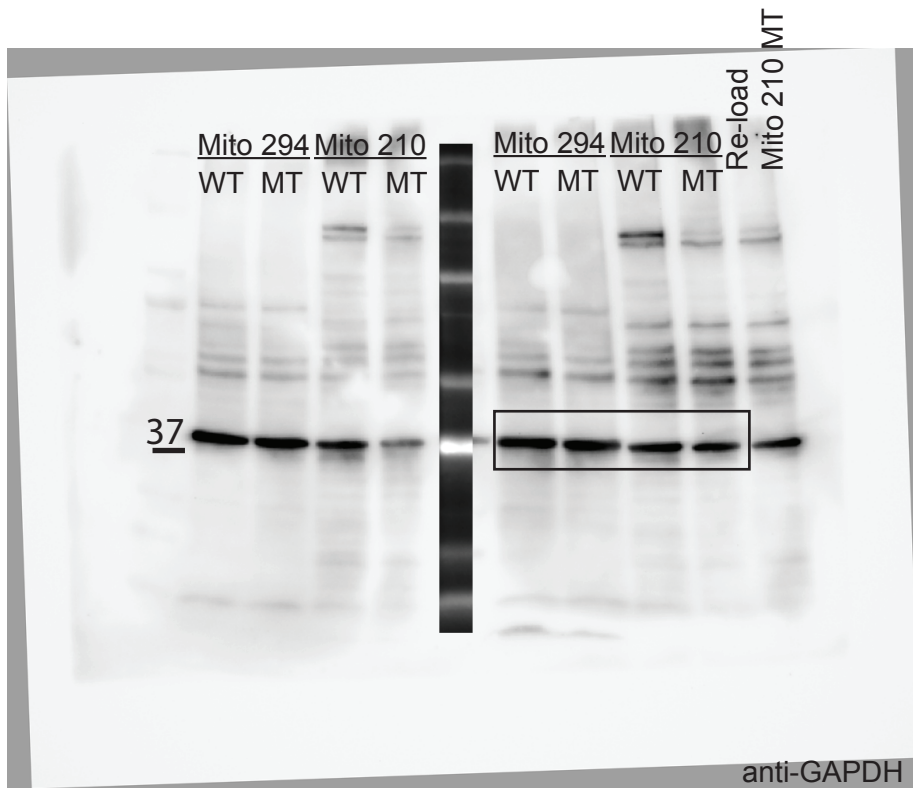

Used in Extended Figure 3e

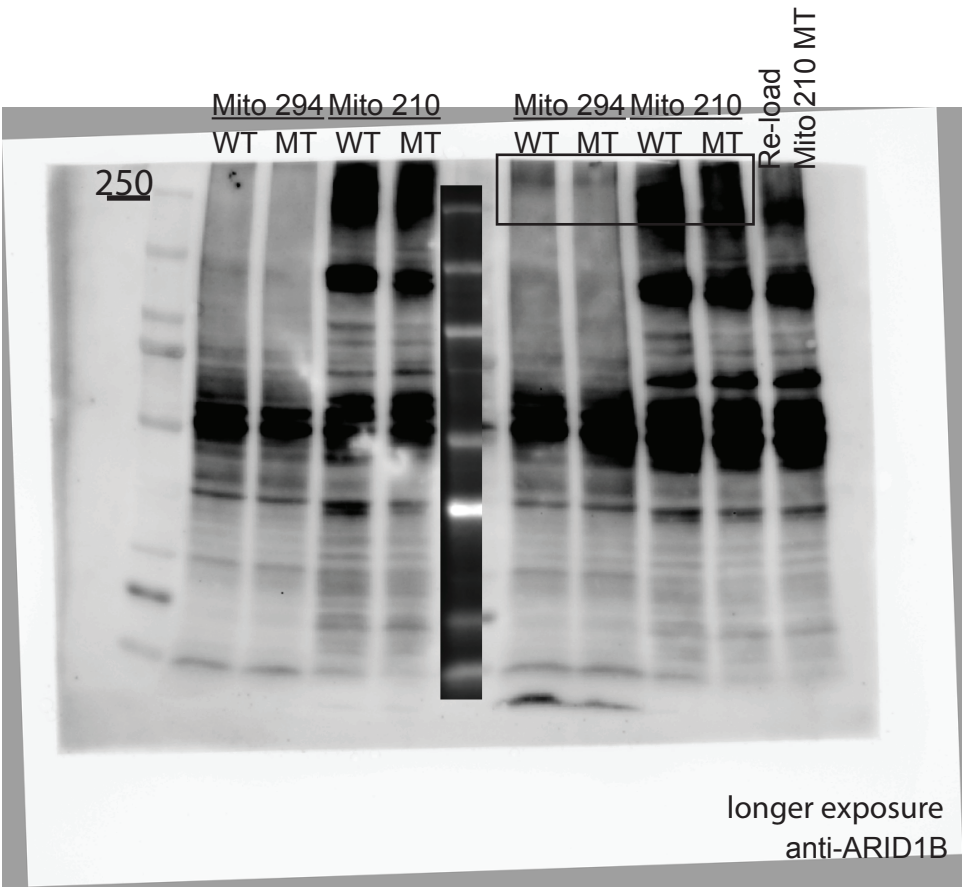

Used in Extended Figure 3e

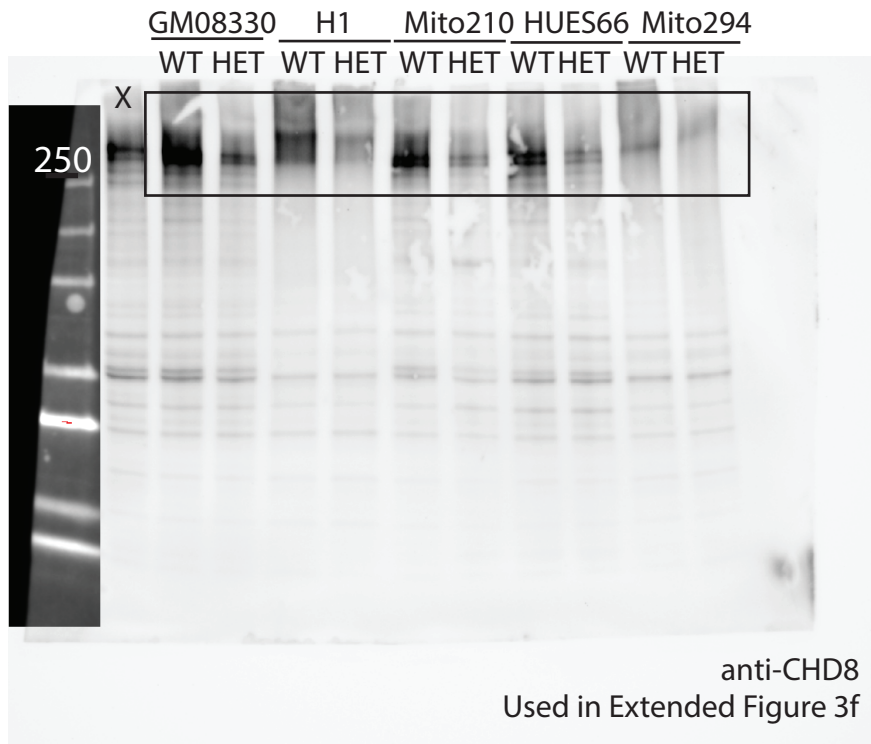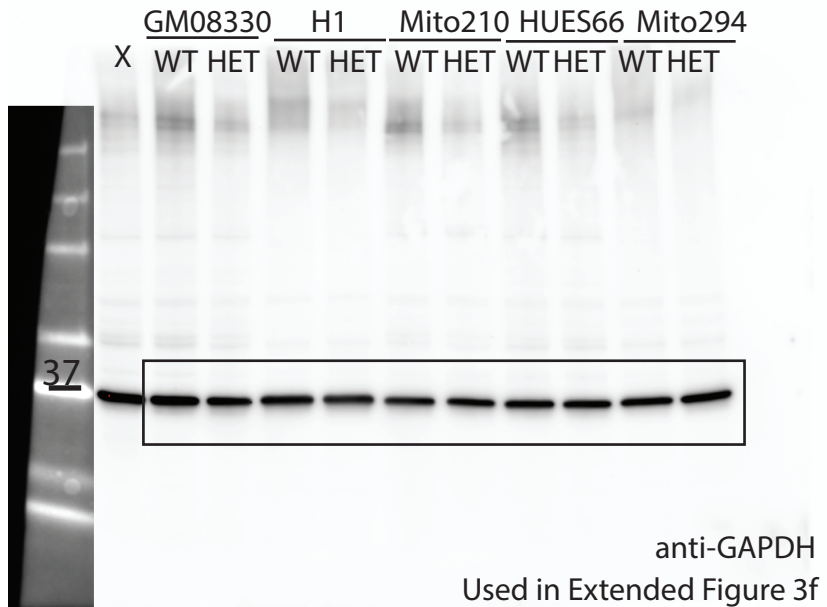

GM08330 H1 Mito210 HUES66 Mito294  
X WT HET WT HET WT HET WT HET WT HET

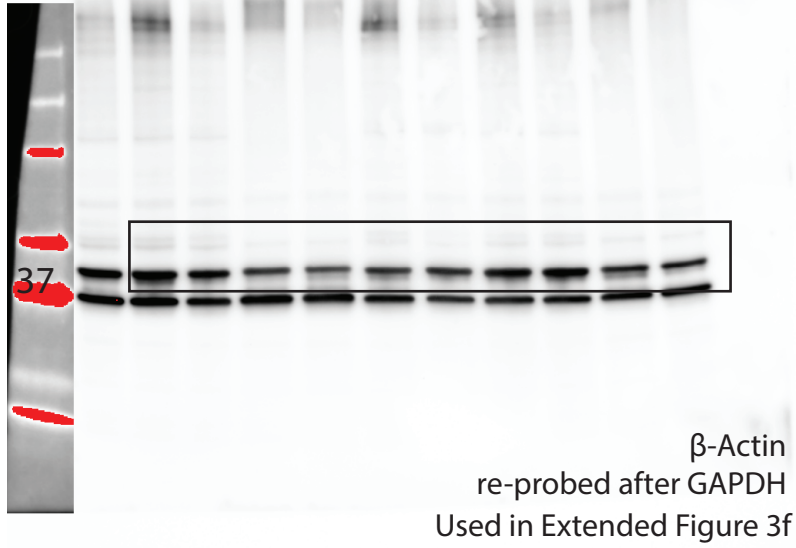

Supplement: NIHMS1768558-supplement-1768558_Sup_Fig_1.pdf [file NIHMS1768558-supplement-1768558_Sup_Fig_1.pdf]
